# Supplementary material for: Selective CO2uptake and vapor adsorption study within Sn(iv) porphyrin crystals
Source: Royal Society of Chemistry journal article supplement (doi:10.1039/c5ce02170g), 2016-01-01
Supplement: c5ce02170g1.pdf [file c5ce02170g1.pdf]

## Supporting Information

### Selective CO<sub>2</sub> Uptake and Vapour Adsorption with Single-Crystal-to-Single-Crystal Transformations within Sn(IV) Porphyrin Crystals

S. Wang, G. P. Knowles, A. L. Chaffee, and S. J. Langford\*

*School of Chemistry, Monash University, Victoria, Australia 3800*

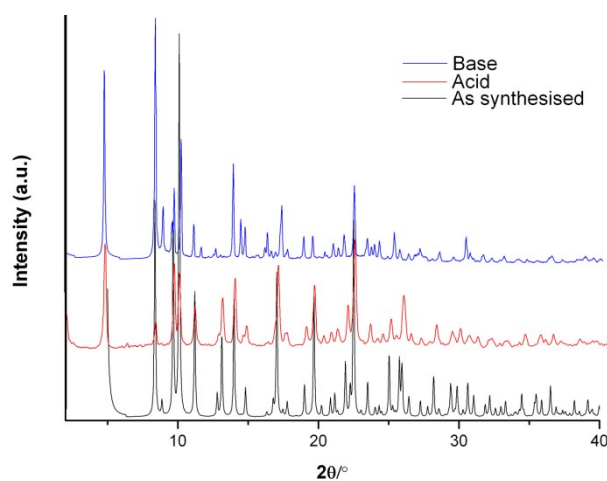

Figure S1 PXRD pattern of synthesised SPM1 (black), SPM1@acid(red) and SPM1@base (blue).

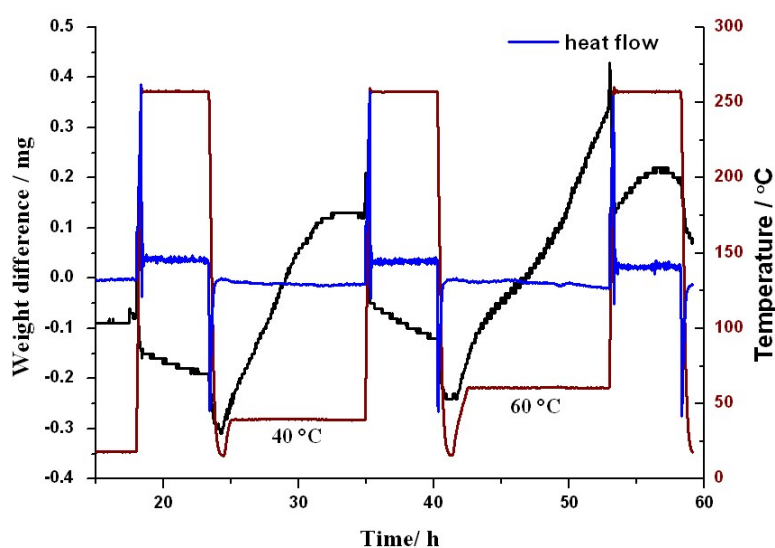

Figure S2 Weight change upon n-hexane vapour uptake in SPM 1 at 40 °C and 60 °C (black), temperature and heat flow change upon time is shown in red and blue respectively.

## NMR spectrum

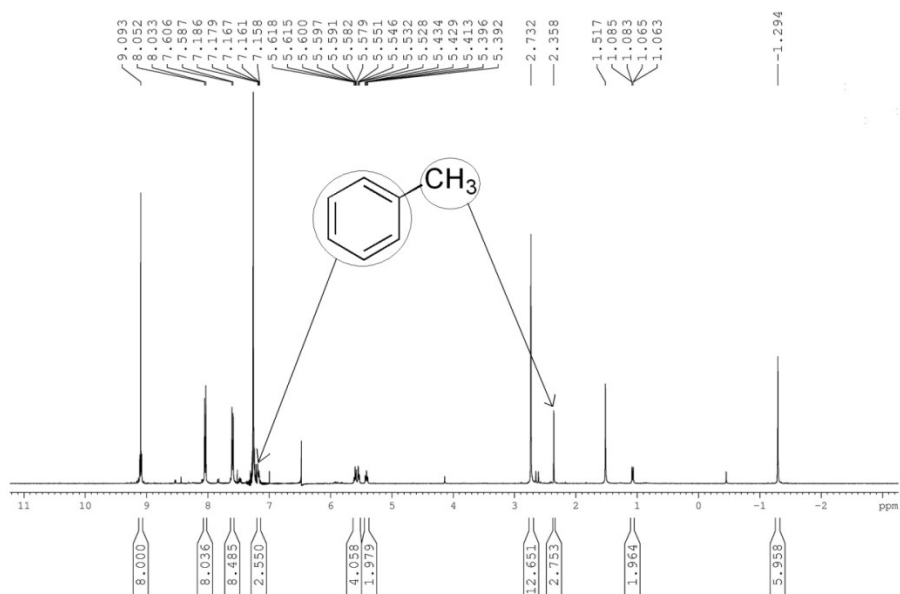

## 1 C toluene

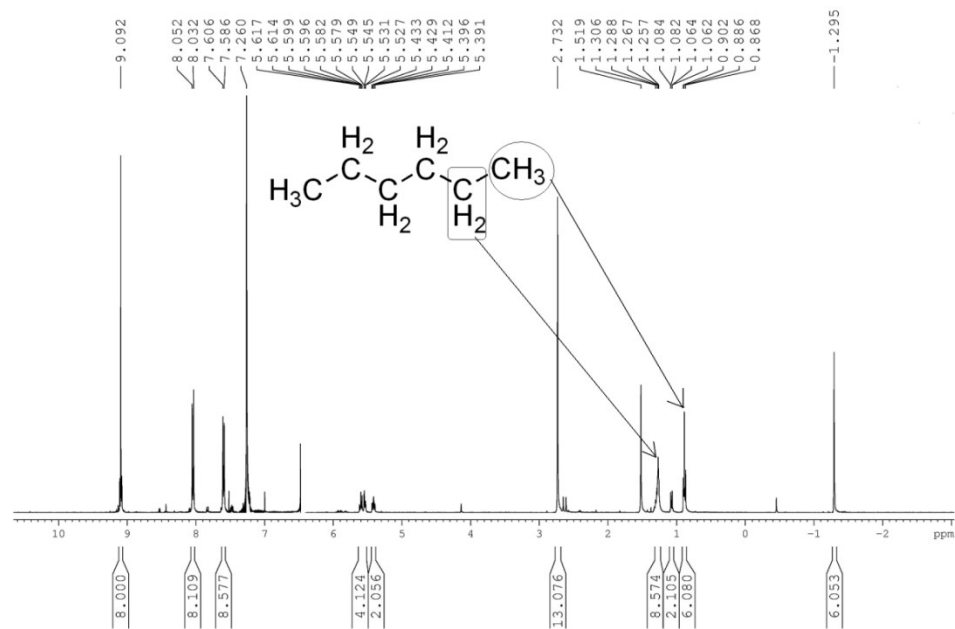

## 1 C n-hexane

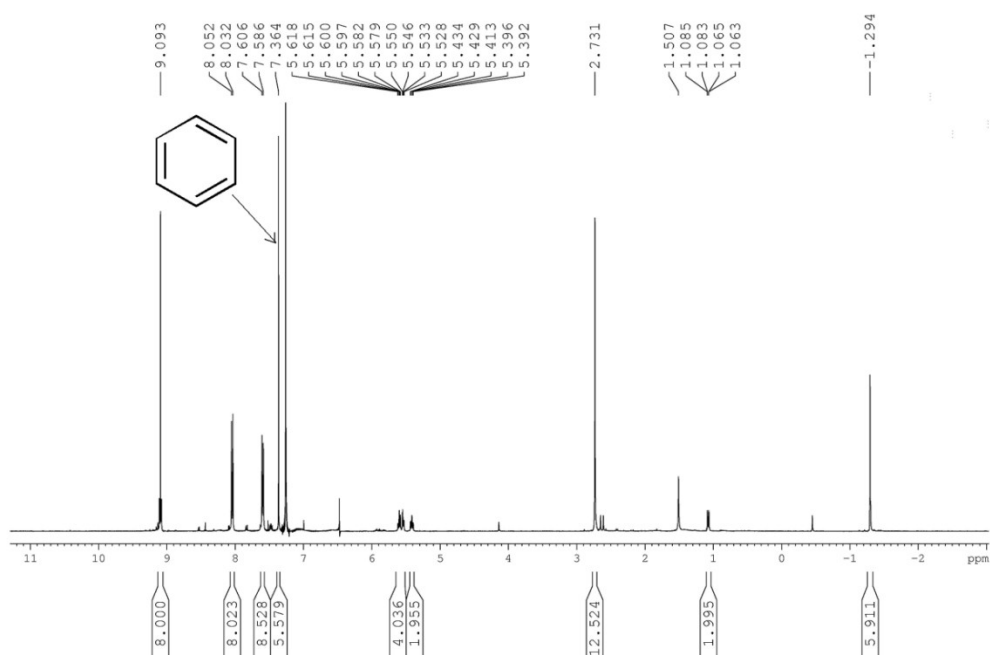

1  $\subset$  benzene

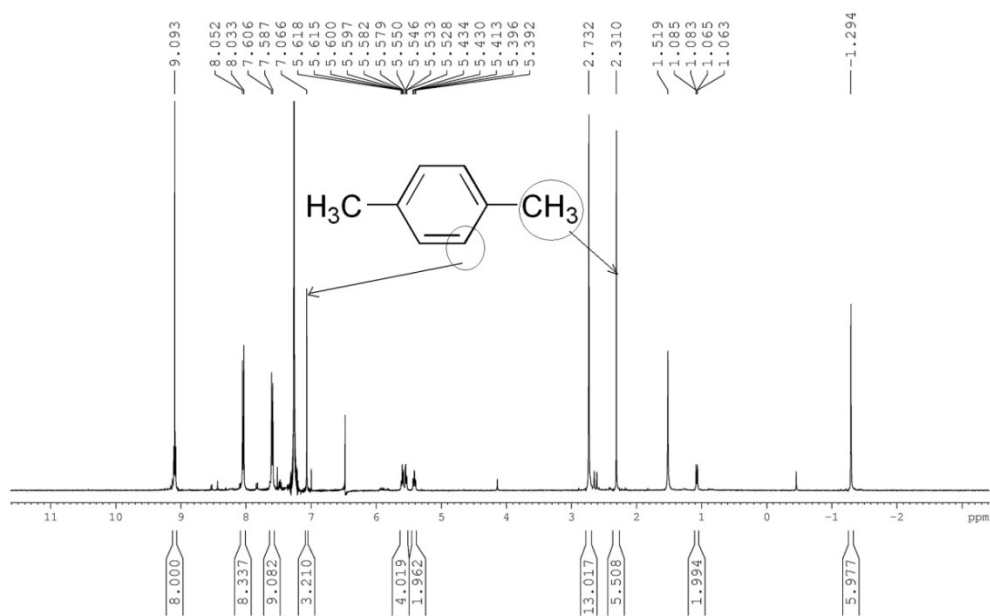

1  $\subset$  *para*-xylene
